# Supplementary material
Source: PubMed Central journal article supplement (PMC7482303)
Supplement: ao0c02317_si_001.pdf [file ao0c02317_si_001.pdf]

## Supporting Information

### **An integrated smartphone-based genetic analyzer for qualitative and quantitative pathogen detection**

Hau Van Nguyen<sup>1</sup>, Van Dan Nguyen<sup>1</sup>, Fei Liu<sup>2,3\*</sup>, Tae Seok Seo<sup>1\*</sup>

1. *Department of Chemical Engineering, Kyung Hee University, Yongin, 17104, South Korea*

2. *School of Ophthalmology & Optometry, School of Biomedical Engineering, Wenzhou Medical University, Wenzhou, Zhejiang 325035, China*

3. *Wenzhou Institute, University of Chinese Academy of Sciences, Wenzhou, Zhejiang 325001, China*

\*Corresponding author

E-mail address: feiliu@wmu.edu.cn; seots@khu.ac.kr; Phone: +82-31-201-3676; Fax: +82-31-204-8114

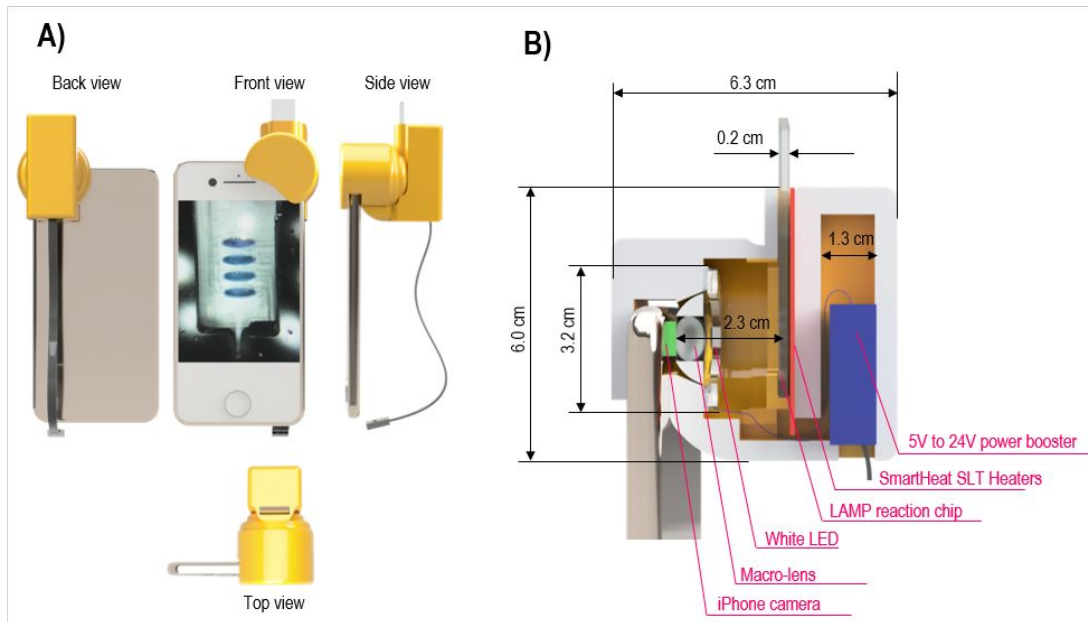

**Figure. S1.** (A) The integrated smartphone-based genetic analyzer with different view, and (B) the cross-sectional schematics to show the structure inside the i-Gene.

**Table S1.** Primer sequence information for the LAMP reaction.

| Target gene /<br>Accession #                                             | Primer               | Sequence (5' to 3')      | Length [bp] |
|--------------------------------------------------------------------------|----------------------|--------------------------|-------------|
| <i>E. coli</i> O157:H7<br>fliC gene<br>(CP002967.1 :<br>2147323-2149017) | FIP                  | CTACCAACCTGTCTGAAGCGCATC | 42          |
|                                                                          |                      | GACATGTTGGACACTTCG       |             |
| <i>S. Typhimurium</i><br>invA gene<br>(M90846.1)                         | BIP                  | GGTGACTGCGGAATCCAGACGTGA | 41          |
|                                                                          |                      | GGCAATTGCATCCATCG        |             |
|                                                                          | F3                   | GCCTGCTGGATGATCTGC       | 18          |
|                                                                          | B3                   | CGGCTCTGCAACCAAAGA       | 18          |
| <i>V.</i><br><i>parahaemolyticus</i><br>toxR gene<br>(L11929.1)          | FIP                  | TCCGCGACACGTTCTGAACCCTCT | 40          |
|                                                                          |                      | ATTGTCACCGTGGTCC         |             |
|                                                                          | BIP                  | TGCCGATTTGAAGGCCGGTACAGT | 38          |
|                                                                          |                      | ACGCTTCGCCGTTT           |             |
| F3                                                                       | GCGGTGGGTTTTGTTGTCT  | 19                       |             |
| B3                                                                       | CGTAAAGCTGGCTTTCCCTT | 20                       |             |
| <i>V.</i><br><i>parahaemolyticus</i><br>toxR gene<br>(L11929.1)          | FIP                  | TCGACTCCACATTCCTCGATTACT | 41          |
|                                                                          |                      | GATAACTTGCCAGACG         |             |
|                                                                          | BIP                  | CCTGCCGAATGGCGATTACAATTA | 40          |
|                                                                          |                      | ATTGTCGATTCAGCCG         |             |
| F3                                                                       | CAACCATGGTGACTGTGA   | 18                       |             |
| B3                                                                       | CCAGCGACCTTTCTCTGA   | 18                       |             |

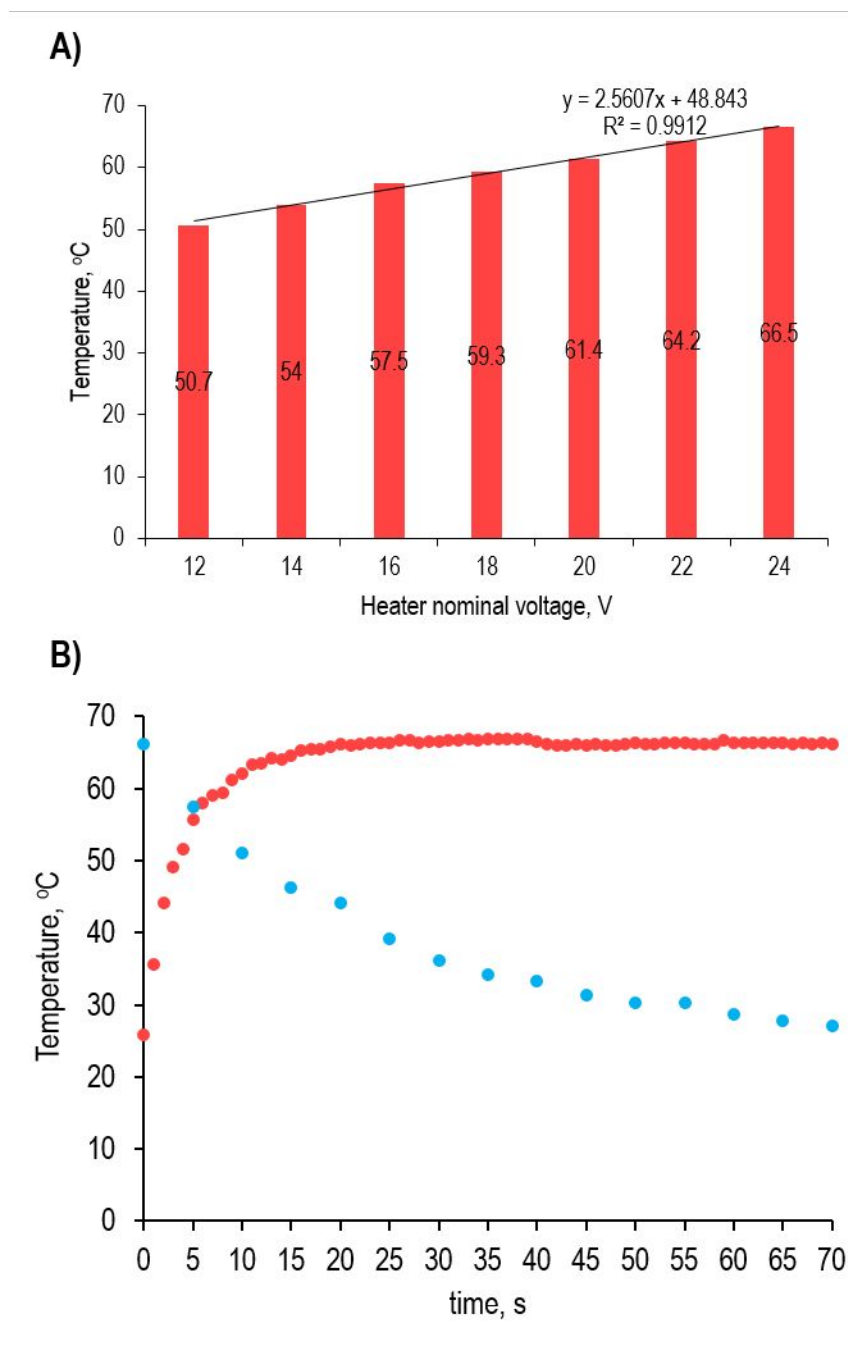

**Figure. S2.** (A) Temperature profile according to the nominal voltage, and (B) the heating and cooling profiles of the heater.

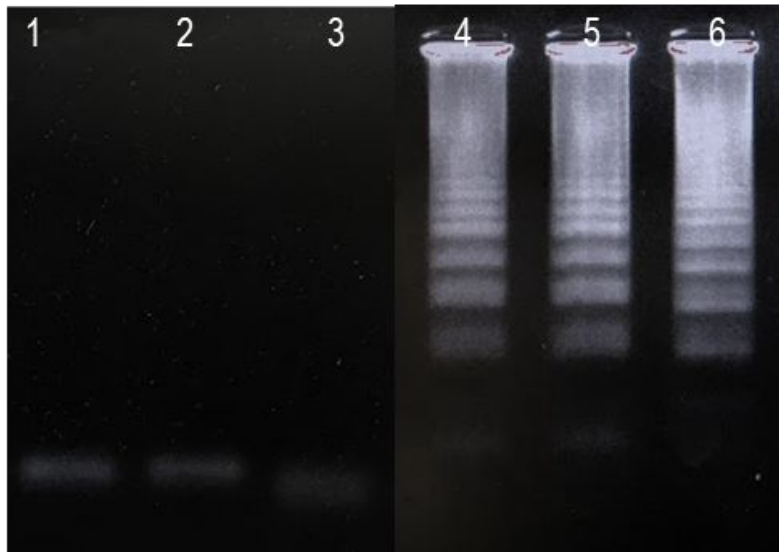

**Figure. S3.** Gel electrophoresis results of the (1) and (4): a negative and positive control of *E. coli* O157:H7; (2) and (5): a negative and positive control of *S. Typhimurium*; (3) and (6): a negative and positive control of *V. parahaemolyticus*.

**Table S2.** The cost of each component and the overall cost of the i-Gene.

| <b>No</b> | <b>Component</b>                             | <b>Company</b>                           | <b>Amount</b> | <b>Cost/AE,<br/>USD</b> | <b>Total,<br/>USD</b> |
|-----------|----------------------------------------------|------------------------------------------|---------------|-------------------------|-----------------------|
| 1         | 1.5 cm close-up smartphone camera macro lens | Shanghai SKINA Digital Technology, China | 1             | 14.1                    | 14.1                  |
| 2         | 6000K white LED                              | Tongyifang, China                        | 8             | 0.4                     | 3.0                   |
| 3         | SmartHeat SLT Thin-Film Heaters              | Minco, USA                               | 1             | 91.0                    | 91.0                  |
| 4         | MicroUSB Boost Type DC-DC Variable Converter | Tuozhanteng Hong Kong Technology, China  | 1             | 2.5                     | 2.5                   |
| 5         | ABS resin for 3D printing platform           | Cubicon, Korea                           | 60 g          | 65.0<br>USD/500g        | 7.8                   |
| Total     |                                              |                                          |               |                         | 118.3                 |
